# Supplementary material
Source: publisher site journal article supplement (https://kjim.org/upload/media/kjim-2023-311-Supplementary-Fig-8.pdf)
Supplement: Supplementary file 1 [file kjim-2023-311-Supplementary-Fig-8.pdf]

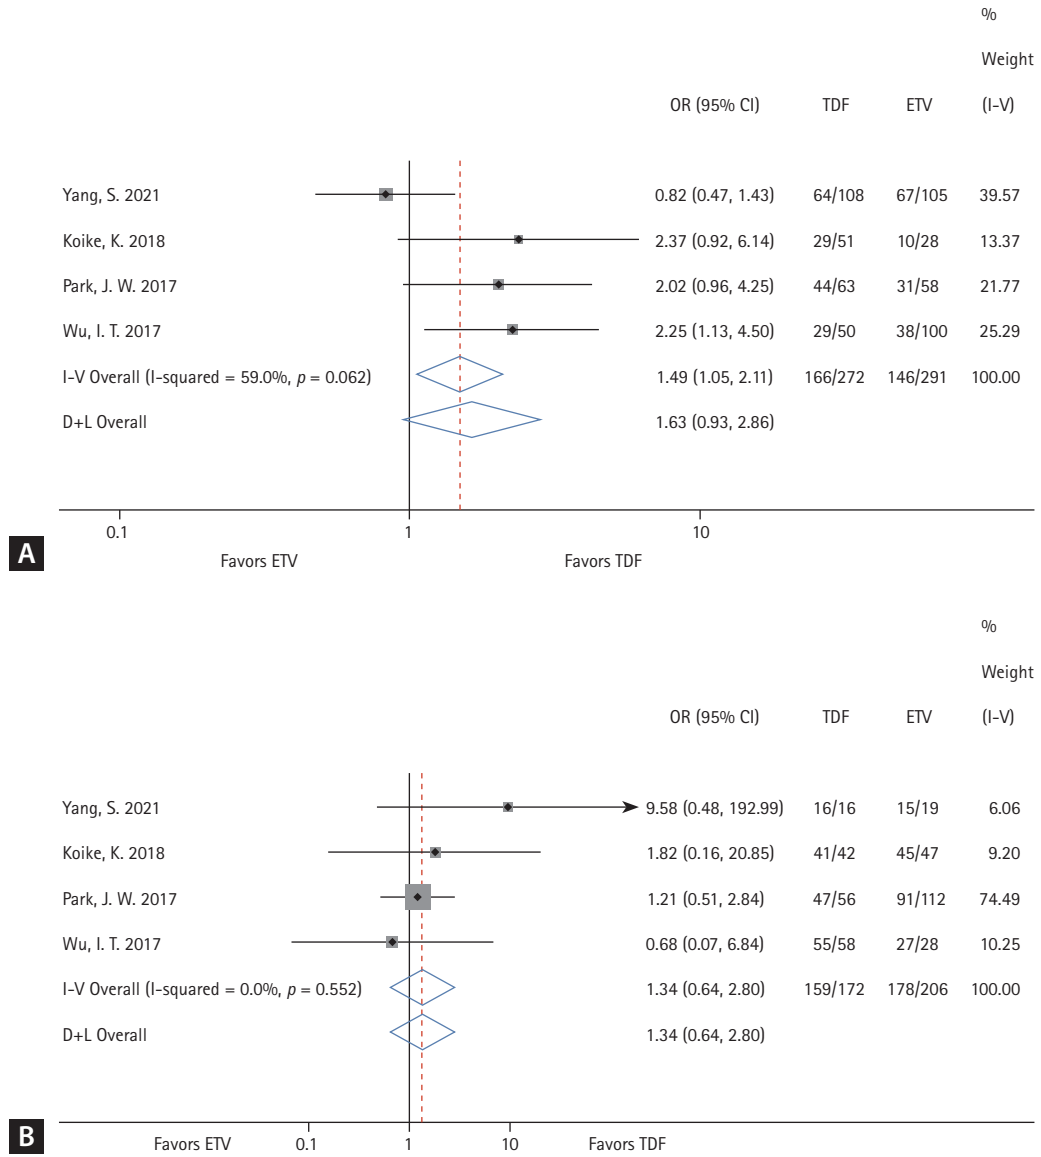

**Supplementary Figure 8.** Subgroup analysis of 48-week virologic response. (A) HBeAg positive group. (B) HBeAg negative group. HBeAg, hepatitis B e antigen; OR, odds ratio; CI, confidence interval; ETV, entecavir; TDF, tenofovir disoproxil fumarate.
